# Supplementary material
Source: publisher site journal article supplement (http://www.spandidos-publications.com/3950/downloadSupplementary)
Supplement: Supplementary file 1 [file downloadSupplementary]

## Sheet: total_N50_stats
Table SIII. Basic infomation of generated unigenes and transcripts.
Type	Total number	Contig N10	Contig N20	Contig N30	Contig N40	Contig N50	Median contig length	Average contig
Transcript	521853	10106	7530	5873	4617	3528	624	1499.65
Unigene	339830	7443	4615	2970	2026	1444	458	874.6
